# Supplementary material
Source: Research Square preprint supplement (doi:10.21203/rs.3.rs-9770845/v1)
Supplement: Supplementary file 1 [file bc828addae472a81875b4b1f.xlsx]

## Sheet: Table S1
Table S1.Basic information of DVL gene families in rice
LOC name	RAP ID	Gene name	No.of Amino Acids	Molecular Weight (Da)	Isoelectric Point (PI)	Instability Index	Aliphatic Index	Hydrophilic Index	Subcellular localization
LOC_Os01g62605	Os01g0844200	OsDVL1	677	56993.6	5.1	48.94	18.91	0.756	Nucleus
LOC_Os03g16600	Os03g0272900	OsDVL2	297	23527.6	5.24	42.09	15.82	0.765	Chloroplast
LOC_Os05g01960	Os05g0110200	OsDVL3	569	47190.7	5.14	44.94	24.6	0.887	Nucleus
LOC_Os05g08620	Os05g0179100	OsDVL4	657	55011.4	5.1	48.77	19.03	0.775	Nucleus
LOC_Os05g38380	Os05g0458200	OsDVL5	600	49540.1	5.12	43.62	21.67	0.818	Nucleus

## Sheet: Table S2
Table S2.Construct the protein sequence of evolutionary tree
>OsDVL1
MELYAVVKPCRLYKKRSSSGGGGKVAMCVRSGGDGGAGKSRPSFTCRCVRLVKEQRARFYIMRRCVTMLVCWHEYQ*
>OsDVL2
MEFYVDDKWKFSKKSRNNGSRRIPGGSGAGGDPFLKRSASSRDQVIGRGRVGSGGGGGAAAAPSSFSSRCAGLVKEQRARFYIMRRCVTMLVCWKDCS*
>OsDVL3
MEAAAGGAREVHVMKKTCKNLKTKEDAAGGNVAVRKEQVMKTTKGLKKSPPPPSSSPEQVKMPCRSYSAENIKHRLTKTVKEHRARFYIIRRCIQMLICWRDEY*
>OsDVL4
MELAAIASASASICSAYRHLSATPADDNGDDNGARPLSSSEELSKSSSSSRRMAKPAELRRRCYAVLKQQRTRLYILRRCVSMLLCWHEHDLSD*
>OsDVL5
MEAMESRAEDQGVKRREPCKKRIGRTAGAGSEAGNGSRHQASCSPPPPPSSSFPRRCARLVKEQRARLYIVRRCITMLACWRDVDYL*
>TaDVL1
MDKCGLSKKRGWKGAMATRRSGGGPSSFPRRCARLVREQRARFYIARRCVAMLACWRHYS*
>TaDVL2
MDKCGLSKKRSGRGAMATRKNGGGPSSFPRRCARLVREQRARFYIARRCVAMLACWRHYS*
>TaDVL3
MELPAASVPHSVCTAYSNLVTTTAAQHRRSRPPPPRRPRQGSCCAMLKQHKTRLYILGRCVSMLLCWHDRDDSD*
>TaDVL4
MEVCGAEEKQTLPKKRGGGKGAAMGVRADGGGGGKGRRPSFPGRCARLVKEQRARFYIMRRCVTMLVCWRDYA*
>TaDVL5
MEGDDKWKLSKKGRSRSGRNYYYGDASGASTSAGTSGGLSRSYSASVTATRDGAGASGSGGGSSSSEQQKKEEADSRRRLSKKCVEAVKEHRARFYIVRRCVSMLVCWRDY*
>TaDVL6
MELPAASVPHSVRTAYSNLVTTTAAPQHRRSRRPRQGRCCAMLKQHKTRLYILGRCVSMLLCWHDRDDSD*
>TaDVL7
MSKTRSQGKRGGGLSRMLREHKARLYIIRRCVVMLLCHHD*
>TaDVL8
MEVCGAEEKQTPPKKRSGGKGAAMGVRADGGGKGRRPSFPGRCARLVKEQRARFYIMRRCVTMLVCWRDYA*
>TaDVL9
MEGDDKWKLSKKGRSRSGRNYYYGDASGSGASTSGGGLSRSYSASVTATRDGSAGASGSGSSSSEQQKKEEAESRRRLSKKCVEAVKEHRARFYIVRRCVSMLVCWRDY*
>TaDVL10
MELPAASVPHSVCTAYSNLVTTTAAAAQHRRTRRPPPRPRQGRCCAMLKQHKTRLYILGRCVSMLLCWHDRDDSD*
>TaDVL11
MEGDDKWKLSKKGRSRSGRNYYYGDASGSGASTSGGLSRSYSASVTATRDGSAGASGSGSGGGSSSSEQQKKEEAESRRRLSKKCVEAVKEHRARFYIVRRCVSMLVCWRDY*
>TaDVL12
MEFYDDEKWKFSKKSRNNGSCRRVSSGGGGGDPFLKRSASTRDQAIGRRGSAAAAAASASGCAAPSFSSRCAGLVKEQRARFYIMRRCVTMLVCWKDCS*
>TaDVL13
MEFYVDEKWKFSKKSRNNGSCRRVSSGGGGGGDPFLKRSASTRDQVIGRRASAAASAPASGCAAPSFSSRCAGLVKEQRARFYIMRRCVTMLVCWKDCS*
>TaDVL14
MEFYDDEKWKFSKKSRNNGSCRRVSSGGGGGGDPFLKRSASTRDQAIGRRASATAAASASGCAAPSFSSRCAGLVKEQRARFYIMRRCVTMLVCWKDCS*
>TaDVL15
MEMCMDDKWKLSKKGSRRSAAVAPAAATGSPVGVKKGRASRGSGRSVPGRLASLAKQQRARFYIMRRCVTMLVCWRD*
>TaDVL16
MEMCMDDQWKLSKKGSRRSAAVAPAVATGSPVGVKGRTSRGSGRSVPGRLASLAKQQRARFYIMRRCVTMLVCWRD*
>TaDVL17
MEMCMDDKWKLSKKGSRRSAAVAPAAATGSPVGVKGRASRGSGRSVPGRLASLAKQQRARFYIMRRCVTMLVCWRD*
>TaDVL18
MGSVRSQGKQGGRVSRALKEHRARLYIIRRCIVMLLCWHD*
>SbDVL1
MRRRKLEGRAPPLLSSSGICIEDLCADCSVPPALALGRIHMGQCASRPEPAAGGDGRRGFLAVAREQRSRFYIFRRCTAMLICWHKYKKI*
>SbDVL2
MEFYVDEKWKFSKKSRNNGSRRVPGAGGAGGGDSLLKRSSSMRDVPAIGRRGSGAAGAAAAAAAAGGCAPQPSFSSRCAGLVKEQRARFYIMRRCVTMLVCWKDCS*
>SbDVL3
MARVSSMESISASVPARSAMCCSTYGRRRRRQKAVGGFAGRCNAVLKQHKTRLYILGRCVSMLLCWHDHDAD*
>SbDVL4
MKKQRGSGGGGLSKVAREHKARLYIIRRCVVMLLCWHD*
>SbDVL5
MELFAAAEEKPCRLFRKRSGGKAAMGGDGGKGRSFSGRCARLVKEQRARFYIMRRCVTMLVCWREYA*
>SbDVL6
MDSSSSGGGDDRWKLSNKGRSRSGRPHAMAMATDDASSAVLSRSYSASVVSSSSSSSRSTQAQAAESSSHSRLSKKKCVEAVKEHRARFYIVRRCVSMLVCWRDY*
>SbDVL7
MEMCLDEKWKLSSSSKKGSRRSAAVAPAATSPRGLNKGRTTSSRGPAARSAAVHGRLASLVKEQRARFYIVRRCVTMLVCWRD*
>SbDVL8
MEMYMEDKSKMLFKKGSRRSTATAAEGSPAAAAAGLKAGRSVPGRLASLVKEQRARFYIMRRCVTMLVCWRD*
>SbDVL9
MEDEGREGSEKQVVEAAKKMMARSGSKNAGAAAPVRGRGHGRRWSSSTDLDIIETASSAAAVTTHTPTAGGGAAAAVLGRSYSTSAAIAVAVDGGVKQQQAAPEGEGEEGEQRPRRRCGGAGARLSRKIKEHRARFYIIRRCVAMLVCWRDADE*
>SbDVL10
MELAASASTSVCSAAYHHLSAADAAAADRGGDSSSGAQGETTTTRLERRRRTKRAGGGGGGCAGLRRRCYAVLKQQRTRLYILRRCVTMLLCWHEHDLSD*
>ZmDVL1
MARVSSVESISASVVTGSAVRSAYGRRQKPVGGLAGRCNAVLKEHKTRLYILGRCVSMLLCWHDHA*
>ZmDVL2
MELAASASASAVCSAYRQLSAPAAAADRGVGGDDAQETATRLDRRRRKRGGGCAGLRRRCYAVLKQQRTRLYILRRCVTMLLCWHQHDLSD*
>ZmDVL3
MEESCDKRSEKQVVAAAKKKKLAKSGHGRRWSSSTDLQDIETATRTAAVDGGMKQQRQQAAREGQGEAVEQRRRCGGAGARLSRKIKEHRARFYIVRRCVAMLVCWRDADD*
>ZmDVL4
MDSSSSAGAGDDRWRLSKKGRSRSGRPHAMDAAAGSVLSRSYSASVSSSRSTAAGTSTAAATGSSAAAPSSQQQQQQQQAGAAACPAESSSSSSSSSSRLSKKCVEAVKEHRARFYIVRRCVSMLVCWRDY*
>ZmDVL5
MELFAAAEEKPCRLFKKRSGGGGKGGMGVRADGSGKGGSFSGRCARLVKQQRARFYIMRRCVTMLVCWREREYA*
>HvDVL1
MFVFSFAIASMELAASASVSVCSAYHHLSTPAEANDDSTRSEPQLRRRRKQAGGNGFGGLRSRCHAVLKQQRTRLYILRRCVSMLLCWNEHDMSD*
>HvDVL2
MEGDDKWKLSKKGRSRSGRNYYYGDASGASTSRGLSRSYSASVTATRPRDGASGSGSSSSEQQQKEEAESRWRLSKKCVEAVKEHRARFYIVRRCVSMLVCWRDD*
>HvDVL3
MELPAASVPHSVCTAYRNLVTPTAAAQHLRSQPSPPRPRRGRGRCCAVLKQHKTRLYILGRCVSMLLCWHDRDDSD*
>HvDVL4
MEVLGAEDKQTPPRKRSGRKGARADGDGRRPSFSGRCARLVKEQRARFYIMRRCVTMLVCWRDYA*
>HvDVL5
MEGDDKWKLSKKGRSRSGRNYYYGDASGASTSAGTGGGLSRSYSASVTATRDGGGASGSGSGSGSGSSSSEQQQKKEEAESRRRLSKKCVEAVKEHRARFYIVRRCVSMLVCWRDY*
>HvDVL6
MEFYVDEKWKFSKKSRNNGSCRRVSGGGGGGGGGDPFLKRSASTRDQAIGRRGSASAAAASASGCAAPSFSSRCAGLVKEQRARFYIMRRCVTMLVCWKDCS*
>HvDVL7
MEMFMDDKWKLSRKGSRRSAAVAPAAATGSPVGVKGRTSRGSGRSVPGRLASLAKQQRARFYIMRRCVTMLVCWRD*
>AtDVL1
MDEKWRLSKKDALAASCSSSSTSSKSKFSRSFSTSASSSKAPAFVRSSSTKCSVPSSSSSSISRSSSKKEKGSITQKYSSLAKEQKGRFYIMRRCVAMLVCWHKHDS*
>AtDVL2
MAEFKSKLNKGHAFTSKCASLVKEQRARLYILRRCATMLCCWYIQGDDSPLAAWQNPFTRNLTLSSDIFWCKTLLQAYKTERERTRDLSAKRAGVFTVSETETVEMLIL*
>AtDVL3
MKGTKKKTPCNKKLGGYLKEQKGRLYIIRRCVVMLICWHD*
>AtDVL4
MEEKWKLSKKDTTASSSSSKSKFSRSFSTSASSTKSPIFVRSSSTKCSVPSSSSSSSSSSSISRSFSRKERRSSSSSSSSITQKYSSLAKEQKARFYIMRRCVAMLVCWHKHGDS*
>AtDVL5
MAPEENGTCEPCKTFGQKCSHVVKKQRAKFYILRRCIAMLVCWHDQNHDRKDS*
>AtDVL6
MASSSSLTRSGSVHLDEKWKLSKKDGGASRITRSSSTSSSSFNGKKQGRCAFTRKCARLVKEQRARFYIMRRCVIMLICWRDNYSDS*
>AtDVL7
MAGLKRKFNKGHAFTSKCVSLVKEQRARLYILRRCATMLCCWYIHGDE*
>AtDVL8
MDVEKLWNHTKKDSIFQTTHFSSSSKPFFTRSFSTKTSSSPSSKSHFTRSFSTKPSSSSSSSDLIFRRSFSAKPKTSKSLLLSRSCSTKSSADLSSKSSSLSRILSKKGASVTGKCFKVAKEHKSRFYIIKRCVLMLVCWHKHS*
>AtDVL9
MSRLRNSAQLQLSKKESLGDNGGALNTTRSSRQKQGKYGFTRKCGRLVKEQRARFYIMRRCVVMLICWTDHNNNNSDHS*
>AtDVL10
MCLFMSNSSLPTKPNRKTRFGDRCLLMAKQQRTRLYILRRCVSMLLCWHDHSISD*
>AtDVL11
MGQCSSATKMRRKRKREEECCRESMERRNKGCLAMVKERRSRFYIARRCILMLLCWHKYANS*
>AtDVL12
MDDENLWKVVKKDSIFETTHFSSKPVFTRSFSTKTSSSSSKPVFTRSFSTKPTSYSSSEPIFRRSFSAKPTSSKSPFLSRSGSTKCPVDTSSTSKCSISRSLSQKGASVTRKCRNMAKEHKSRFYIMKRCVLMLVCWHKHACDS*
>TaDLH20
MASPQCCANPPTLNPAGGEGRVVDDGFGGIAAYVAGSAGSKAAVILVSDIFGFEAPNLRKIADEVASSGYLVVVPDFLHGEPYSHENADRPFPAWIKDHAPEKEFEEAKRIIAALKEQGASSIGAAGYCWGAKLVTELAKANEIQAAAMSHPSFVSVDDIKETKCPIAILGAETDFMSPPELVKQFEQILSDSGIRHFVKIYPGVSHGWTVRYNSDDATAVKWAEQAMVDMTSWFNENLK*
>TaDLH21
MAAATVRSTLAPCLLLLLLLSTALASAATAPRLVLLAPSGSHTPCLDNPPDLTAAGDEAGELVRDLGGLQAYVTGSRSSPRAIVLASDYFGFQAPKLRKIADQVADDGYLVVVPDLLHGDPFRDEAKISFQDWLKTHSPVEAAEKTKVLIAALKKLGVSEVGVGGYCWGAKVAVELSKSQEIQVVVISHPSLVTVDDMKEVKHPIEILGGELDQASPPPIVHQFQQALDQNKKIDHFVKIFPGVAHGFACRYNASNAFAVKTAEEARADMLSWFNKYLKKHQELSLHES*
>TaDLH22
MAATAAAAAVRPSLPITPPRRERSAAFCSLAPATSAPSTRLPPSSVPLQRWRCTAVTHPRSRRLHGPRCSQAEVASSTVDDDEACELVRGTDVVIGQGDDESVRAYLLEAVKNNNGTCVLFLSDVFGFEDSATRDFAYRIACHGYNVLVPDLFRGNPWKKSLPMDGFQAWLAEQAPERVAGDIDTCRKWLVDDFLAAAPSKKLGVVGFCYGGGRLVETLARDADAACFSAGVCFYGSRMDASLGAQIAAPVLFVCGDGDLLCPVETVRELERSARGAKAAVYAGRGHGFAHRPESLEDDGDAEEAFAMMKSWLHDHLLA*
>TaDLH23
MALELLRSFLLCLAVLAGRAASASLHSQCLDNPPDLTAAGAEAGKVVDDLAGFRAYVTGPVHSDRAIVLASDIFGFEAPLLRQAADKVAEAGYYVVVPDFFNGKPYMGDPSVNITQWIDDHSPVKAARDAKPIFATLKKEQKSIIGVGGYCWGGKFAVEIAKMEEVKAIVVSHPSSIIVDDMREVKCPIEILGAQNDTTTPQKFIYQFLQALRKRSDKVPYFGKIFPGVAHGFACRYNSTDPFAVRTAEQALALMLDWFKKYLE*
>TaDLH24
MALELLYTSLICLAALAGGATSAPLHLQCLDNPPDLTAAGAQAGKVVDDLSGFRAYVTGPVHSDRAIVLASDIFGFEAPLLRFDHLLPLHSLSFDLRIFFFKKRYILSEEGSSPSISTPGRQAADKVAEAGYYVVVPDFFNGKPYTGDPSVNITQWIDDHSPVKAARDAKPIFATLKKERKSIIGVGGYCWGGKFAVEIAKMDEVKAIVISHPSSIVVDDMREVKCPIEILGAQNDTTTPQKFIYQFLHALRKRSDKVPYFGKIFPGVAHGFACGYNSTDPFAVRTAEQALALMLGWFKKYME*
>TaDLH25
MALELLYTSLICLAALAGGATSAPLHLQCLDNPPDLTAAGAQAGKVVDDLSGFRAYVTGPVHSDRAIVLASDIFGFEAPLLRQAADKVAEAGYYVVVPDFFNGKPYTGDPSVNITQWIDDHSPVKAARDAKPIFATLKKERKSIIGVGGYCWGGKFAVEIAKMDEVKAIVISHPSSIVVDDMREVKCPIEILGAQNDTTTPQKFIYQFLHALRKRSDKVPYFGKIFPGVAHGFACGYNSTDPFAVRTAEQALALMLGWFKKYME*
>TaDLH26
MALDLLYSFLLCLIVLAGRATSAPLHSQCLDNPPDLTSTGAEAGKVVDDLAGFTAYVTGPVHSDRAIVLASDILGFEAPLLRQAADKVAEAGYYVVVPDFFNGKPYTGDPSVNITQWIDDHSPESLQWK*
>TaDLH27
MAMEVLYPFFLCLAVLTGRAVSAPPHSQCHDNPPDMTAARVEAGKVVHDFAGYTAYVTGAIHSDRAVVLASDVYGFEAPLLRKIADKIGEAGYYVVVPDFFNGQPLTGAPGENLTQWLSEHSPVKAAQDAKPIFATLRKERKFSLGVGGYCWGGKFAVEVAKMNEVKAVVISHPYSVIVGDMREVKCPIEILGGEYDQATPQKFIYQFLNALRKRSDKIPYFGKIFPGVCHGFACRYNVTNPFEVETGEQALALMVGWFEKHLK*
>TaDLH28
MAMEVLYPFFLCLAVLTGRAVSAPPHSQCHDNPPDMTAARVEAGKVVHDFAGYTAYVTGAIHSDRAVVLASDVYGRKIADKIGEAGYYVVVPDFFNGQPLTGAPGENLTQWLSEHSPVKAAQDAKPIFATLRKERKFSLGVGGYCWGGKFAVEVAKMNEVKAVVISHPYSVIVGDMREVKCPIEILGGEYDQATPQKFIYQFLNALRKRSDKIPYFGKIFPGVCHGFACRYNVTNPFEVETGEQALALMVGWFEKHLK*
>TaDLH29
MEVLYPFFLCLAVLTGRAVSAPPHSQCHDNPPDMTAARVEAGKVVHDFAGYTAYVTGAIHSDRAVVLASDVYGFEAPLLRKIADKIGEAGYYVVVPDFFNGQPLTGAPGENLTQWLSEHSPVKAAQDAKPIFATLRKERKFSLGVGGYCWGGKFAVEVAKMNEVKAVVISHPYSVIVGDMREVKCPIEILGGEYDQATPQKFIYQFLNALRKRSDKIQCHQPIRSRNR*
>TaDLH30
MAMEVLYPLFLCLAVLAGTAASAPPHSRCLDNPPDLTAARVESGKVVHDFAGYKAYVTGAIHSDRAVVLASDVFGRKIADKVGEAGYYVVVPDFFNGQPLTGTPGENLTKWLNEHSPVKAAQDAKPIFATLRKEQKFSLGVGGYCWGGKFAVEIAKMNEAKAIVISHPYSVIVGDMREVKCPIEILGGENDPTTPPKFIYKFLNVLRKRSDKIPYFGKIFPGVAHSFACRYNITNPFKVKTTEQALALMVGWFEKHLK*
>TaDLH31
MAMEVLYPLFLCLAVLAGTAASAPPHSRCLDNPPDLTAARVESGKVVHDFAGYKAYVTGAIHSDRAVVLASDVFGFEAPLLRKIADKVGEAGYYVVVPDFFNGQPLTGTPGENLTKWLNEHSPVKAAQDAKPIFATLRKEQKFSLGVGGYCWGGKFAVEIAKMNEAKAIVISHPYSVIVGDMREVKCPIEILGGENDPTTPPKFIYKFLNVLRKRSDKIPYFGKIFPGVAHSFACRYNITNPFKVKTTEQALALMVGWFEKHLK*
>TaDLH32
MAMEVLYPFFLCLAVLAGRAASTPPHSQCLDNPPDFTAARVEAGKVVHDFAGYKAYVTGAIHSDQAVVLASDVYELHEHGYSIFISSGFEAPLLRKIADKVGEAGYYVVVPDFFNGQPLTGAPGENLTQWLSEHSPVKAAQDAKPIFATLRKERKFSLGVGGYCWGGKFAVEIAKMNEVKAIVISHPYSVIVGDMREVKCPIEILGGENDPATPQKFIYKFLNVLRKRSDKVQYHQPIRSQNR*
>TaDLH33
MAMEVLYPFFLCLAVLAGRAASTPPHSQCLDNPPDFTAARVEAGKVVHDFAGYKAYVTGAIHSDQAVVLASDVYGFEAPLLRKIADKVGEAGYYVVVPDFFNGQPLTGAPGENLTQWLSEHSPVKAAQDAKPIFATLRKERKFSLGVGGYCWGGKFAVEIAKMNEVKAIVISHPYSVIVGDMREVKCPIEILGGENDPATPQKFIYKFLNVLRKRSDKVQYHQPIRSQNR*
>TaDLH34
MAMEVLYPFFLCLAVLAGRAASTPPHSQCLDNPPDFTAARVEAGKVVHDFAGYKAYVTGAIHSDQAVVLASDVYGFEAPLLRKIADKVGEAGYYVVVPDFFNGQPLTGAPGENLTQWLSEHSPVKAAQDAKPIFATLRKERKFSLGVGGYCWGGKFAVEIAKMNEVKAIVISHPYSVIVGDMREVKCPIEILGGENDPATPQKFIYKFLNVLRKRSDKIPYFGKIFQGVAHGFACRYNITNPFEVKTGEQALALMVGWFQKHLK*
>TaDLH35
MAMEVLYPFFLCLAVLAGRAASTPPHSQCLDNPPDFTAARVEAGKVVHDFAGYKAYVTGAIHSDQAVVLASDVYGRKIADKVGEAGYYVVVPDFFNGQPLTGAPGENLTQWLSEHSPVKAAQDAKPIFATLRKERKFSLGVGGYCWGGKFAVEIAKMNEVKAIVISHPYSVIVGDMREVKCPIEILGGENDPATPQKFIYKFLNVLRKRSDKIPYFGKIFQGVAHGFACRYNITNPFEVKTGEQALALMVGWFQKHLK*
>ZmDLH1
MRHVLPTKPTPPPVLFIYHTHATPGCGSHNTSHNHYSCSTASGRPTHQAASAMPSSAQVLLCLAAVLAAAAATTAEAHSQCLDNPPDRSIHGRQLAEAGEVVHDLPGGLRAYVSGAASSSRAVVLASDVFGYEAPLLRQIADKVAKAGYFVVVPDFLKGDYLDDKKNFTEWLEAHSPVKAAEDAKPLFAALKKEGKSVAVGGYCWGGKLSVEVGKTSDVKAVCLSHPYSVTADDMKEVKWPIEILGAQNDTTTPPKEVYRFVHVLRERHEVPYYAKIFQGVEHGFACRYNTTDPFAVKTAETALAYMVSWFNKHLN*
>ZmDLH2
MSLPCSGAPSPPNLPAAPVLFISHATPGCGSHNTSHNHYSCSTASGRPTLQAASAMPSSAQVLLCLAAVLAAAAATTAEAHSQCLDNPPDRSIHGRQLAEAGEVVHDLPGGLRAYVSGAASSSRAVVLASDVFGYEAPLLRQIADKVAKAGYFVVVPDFLKGDYLDDKKNFTEWLEAHSPVKAAEDAKPLFAALKKEGKSVAVGGYCWGGKLSVEVGKTSDVKAVCLSHPYSVTADDMKEVKWPIEILGAQNDTTTPPKEVYRFVHVLRERHEVPYYAKIFQGVEHGFACRYNTTDPFAVKTAETALAYMVSWFNKHLN*
>ZmDLH3
MASSQCCDNPPALNPACGEGKVVDSFGGLKAYVAGPEDSKAAVVLVADVFGFEAPIMRKIADKVASSGYFVVVPDLFHGDPYAPENVEKPFPVWIKSHTPEKGFEETKQVIGALKEKGVSAVGAAGYCWGAKVVVELAKAHEIQAAVLLHPSFVTVDDIKEVKCAISILGAEIDKMSPPELIKQFEQVLSLNSGVGHFVKIFPGVAHGWSVRYNHDDAAAVKSAEEAFADMLDWFNKNLK*
>ZmDLH4
MASSRCFENPPVLEPASGGGEVVDDFGGQKAYVSGSAGSKAAVVLISDAFGFEAPNLRKIADKVASLGYFVVVPDFLHGDPYDPSNNAHSNPGTWIQSHNPQTAFEEAKPVIAAIKEKGVSSIGAAGYCWGAKVVVELAKVHEIQAAVLAHPSLLTVDDMKDVKCPISILGAEIDRSAPPELLKQFEQVLSANPEVDHFVKVFPGVAHGWAVRYSDDDAAAVTSAEEALRDMSHWFNKYLN*
>ZmDLH5
MVPAAAAVAAASPAALPRSTSPRGRRPRARACSFRCAGPSARSSALVSSYVSQKSGSAGHGHPRIRQLRGRPDCSRQAEVMGSTVDDDEACELVSGSDLVIGEGDDSVSAYLFKAVKNNNGTGILLLSDIFGFQDSATRDFAYRVACNGYNVLVPDLFRGNPWKLNVPFDGDSFERWRAGQAPGRVSGDIDACTRWLVDEFKAAGVSKKLGVIGFCYGGGRLVETLARDAESCFSAGVCFYGSRMDASLGDRVAAPVLFVCGDGDPLCPVETVRELEGRARGARAAVYAGRGHGFAHRPQSVEEDGDAEDAFNAMRGWLHDHLLA*
>ZmDLH6
MASSQCCDNPPALNPACGKGKVVDSFGGLKAYVAGPEDSKAAVVLVADVFGTSSFLLPLEIVRLWYGTLQVKSLLSPLAGFEAPILRNIADKVASSGYFVVVPDFFHGDPYVPENAEKLIPVWLKSHTPEKGFEEAKPVIAALKEKGVSAVGAAGYCWGAKVVVELAKANELLQAAVLXXXXNITPEVKCSISILGAEMDVRSPPELVKQFEQALSVNSGVGHFVKVFPGVAHGWSVRYSLDDAAAVKSAEEAFADMLDWFNKNLK*
>ZmDLH7
MASSQCCDNPPALIPACGKGKVVDSFGGLKAYVAGPEDSKAAVVLVADVFGTSSFLLPLEIVRLWYGTLQVKSLLSPLAGFEAPILRNIADKVASSGYFVVVPDFFHGDPYVPENAEKLIPVWLKSHTPVRCPLPFPELFL*
PGRPTRDCLFSDPARDGKSILKIWNLNEHSGVIGAFNCQGAGWCQVGKKNLIHDEQPGTV
TGVIRAQDVGYLAKVADQSWNGDVIVYSHVGGEVVYLPKNASLPVTLRSREYEVFTVVPL
KHLPNGVSFAPIGLVGMFNSGGAVREVRFSEDADVELKVRGSGTVGAYSSTRPRSVTIDS
KAVGFCYDDACGQLTFELGLSEQELYFWTVSVGY*

## Sheet: Table S3
Table S3.Genetic diversity of the 5 DVL genes in four major rice populations
Genes	Xian		Geng		Aus		Bas		admix		3KRG
	EH	gcHapN	EH	gcHapN	EH	gcHapN	EH	gcHapN	EH	gcHapN	EH	gcHapN
OsDVL1	0.0503537	8（4）	0.000431382	5（2）	0.0634154	6（1）	0.148634	6（1）	0.309861	9（3）	0.119498	12（6）
OsDVL2	0.0998205	8（5）	0.031911	6（1）	0.133156	5（2）	0.172193	5（1）	0.0108329	5（2）	0.117453	9（5）
OsDVL3	0.123896	15（3）	0.14389	12（3）	0.127095	5（2）	0.142591	4（1）	0.439615	12（2）	0.000489883	20（7）
OsDVL4	0.121334	59（4）	0.147016	20（2）	0.080357	11（1）	0.0177372	12（1）	0.0194362	17（2）	0.190879	81（7）
OsDVL5	0.0332364	9（2）	0.0414701	10（1）	0.162308	5（2）	0.0762578	5（1）	0.316444	9（2）	0.120115	14（4）
Mean	0.0857283	17(3.6)	0.0729438	10.6(1.8)	0.113266	6.4(1.6)	0.111483	6.4(1)	0.219238	10.4(2.2)	0.109687	27.2(5.8)
EH and gcHapN （major gcHapN) are Shannon’s equitability, and all the gcHaps number （major gcHaps present in >1% rice accessions and 1 gcHap) of the 3KRG, respectively.

## Sheet: Table S4
Table S4.The Nei’s genetic identity among five major populations calculated from the gcHap data of rice OsDVL genes.
Gene name	Nei’s genetic identity (INei) among five major rice populations of 3KRG
	XI-GJ	Aus-XI	Aus-GJ	XI-Bas	Aus-Bas	GJ-Bas	XI-Adm	Adm-GJ	Aus-Adm	Adm-Bas
OsDVL1	0.0355698	0.999813	0.0233245	0.0641456	0.0519376	0.998423	0.714989	0.640284	0.707055	0.658945
OsDVL2	0.204375	0.995568	0.283634	0.432563	0.504749	0.970511	0.898076	0.575665	0.923674	0.748811
OsDVL3	0.375871	0.90849	0.400609	0.959691	0.986932	0.439674	0.884777	0.725101	0.877072	0.914274
OsDVL4	0.0488243	0.991731	0.0439208	0.142594	0.144106	0.137811	0.784359	0.595595	0.777892	0.271719
OsDVL5	0.0170573	0.999904	0.0111306	0.0481529	0.0422735	0.999386	0.843718	0.491345	0.839662	0.515558
XI, Xian/indica; GJ, Geng/japonica; Bas, Basmati; Adm, Admixtures.

## Sheet: Table S5
Table S5.Frequency shifts in the predominant gcHaps at 4 DVL genes between the landraces and modern varieties.
Gene name	Xian (indica)							Geng (japonica)
	predominant gcHap	Frequency in LANs	Frequency in MVs	MVs - LANs	statistical significance	P value	ZEH value	predominant gcHap	Frequency in LANs	Frequency in MVs	MVs - LANs	statistical significance	P value	ZEH value
OsDVL1	Hap1	0.977	0.927	-0.05	**	0.952	-3.52023	Hap2	0.944	0.892	-0.052	ns	0.918	-1.89647
OsDVL3	Hap1	0.784	0.485	-0.299	**	0.6345	-9.3444	Hap2	0.651	0.784	0.133	**	0.7175	2.95598
OsDVL4	Hap1	0.816	0.808	-0.008	ns	0.812	-0.308157	Hap2	0.721	0.331	-0.39	**	0.526	-7.81544
OsDVL5	Hap1	0.984	0.957	-0.027	**	0.9705	-2.40157	Hap2	0.935	0.935	0	ns	0.935	0
Mean
*, and * indicate the statistical significance at levels of P<0.05 and 0.01, respectively based on Z tests. Z0.01= ±2.33, Z0.05= ±1.96
The population size was 732 and 328 for populations LANs-Xian and MVs-Xian, and 358 and 139 for populations LANs-Geng and MVs-Geng, respectively.

## Sheet: Table S6
Table S6.Phenotypic comparisons between the predominant gcHap and the unfavorable gcHap at 4 polymorphic DVL genes for 15 agronomic traits in the 3KRG accessions
Gene name	DTH (day)	PH (cm)	FLL (cm)	FLW (cm)	PN (count)	PL (cm)	CN (count)	CL (cm)	GL (mm)	GW (mm)	GLWR (ratio)	TGW (g)	LRI (%)	SH (cm)	LL (mm)	Total
OsDVL1			1				1	1			1			1	1	6
OsDVL3	1		1	1	1	1		1	1	1	1	1		1	1	12
OsDVL4		1	1			1		1	1	1	1				1	8
OsDVL5			1		1		1							1		4
Total	1	1	4	1	2	2	2	3	2	2	3	1		3	3	30
The checkmark (1) indicates a significant difference in this trait between the predominant and unfavorable gcHaps at specific RS loci in the 3KRG accessions.

## Sheet: Table S7
Table S7. The primers used in this study
Gene name	Forward sequence（5’→3')	Reverse sequence（5’→3')
OsDVL2	CTCCAGGGACCAGGTGATCG	AGCGGCGCATGATGTAGAAG
OsDVL4	GATGACAACGGCGACGACAA	GTACAGCCTCGTCCTCTGCT
LOC-Os03g61970.1	GACAGGATGAGCAAGGAGA	GAGGGAGGCAAGGATAGAA
